## Adult Psychiatry Position near St. Louis, MO

**SIGN ON BONUS & FELLOWSHIP STIPEND AVAILABLE**

**Mercy Clinic**, a regional and national recognized leader in healthcare, is seeking a **BE/BC Adult Psychiatrist** to join our busy team on campus of **Mercy Hospital Jefferson in Festus, MO** (near St. Louis, MO).

The prospective candidate will join an Adult Psychiatry group, with emphases on outpatient services and Intensive Outpatient Program. We have a contracted team that provides Inpatient coverage in our 60 bed unit (both Adult & Geriatrics) & 12 bed medical/psychiatric unit

### This Position Offers:

- Integrated health system with a competitive income guarantee.
- Comprehensive benefits including health, dental, vision and CME.
- Relocation assistance and professional liability coverage.
- System-wide EPIC EMR.

### For more information, please contact:

**Lisa Hauck MBA | Senior Physician Recruiter**  
314-364-3840 | Fax: 314-364-2597  
[lisa.hauck@mercy.net](mailto:lisa.hauck@mercy.net) | [www.mercy.net](http://www.mercy.net)

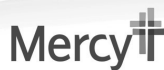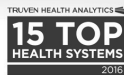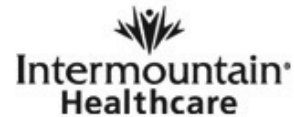

*Helping People Live the Healthiest Lives Possible.*

Psychiatrists are currently needed in:  
**Ogden • Provo • Salt Lake City • St. George**

- Mental Health Integration Medical Director opening in Salt Lake City
- Psychiatry Medical Director opening in Provo

Employment with Intermountain Medical Group. Competitive salary with transition to production and additional income for meeting quality goals. Stipend available. Signing bonus and loan repayment available. Full Intermountain benefits to include defined pension, 401k match & CME. Relocation provided up to 15K.

For the second year in a row, Forbes magazine has named Intermountain one of the top 3 healthcare organizations, a top 25 employer overall.

Contact Intermountain Physician Recruiting.  
800-888-3134 **PhysicianRecruit@imail.org**  
<http://physicianjobsintermountain.org>

## Pocket Guide to Addiction Assessment and Treatment

Edited by Petros Levounis, M.D., M.A.,  
Erin Zerbo, M.D., and Rashi Aggarwal, M.D.

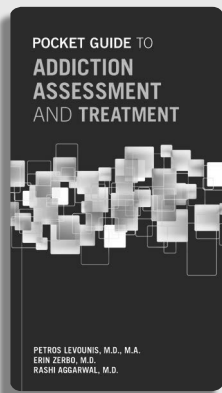

*The Pocket Guide to Addiction Assessment and Treatment* is designed specifically to aid a wide range of clinicians, regardless of their training in addiction, to more confidently assess and treat this patient population. With an accessible, easily referenced format, this book serves as a go-to resource for general psychiatrists other practitioners involved in the addiction treatment field. And because all of the diagnostic discussions are DSM-5®-based, readers can be confident that they're getting the most relevant and up-to-date guidance on the topic.

2016 • 379 pages • ISBN 978-1-58562-512-3 • Paperback  
\$65.00 • Item #62512

2016 • 379 pages • ISBN 978-1-58562-512-3 • eBook  
\$52.00 • Item #37072

AMERICAN  
PSYCHIATRIC  
ASSOCIATION  
PUBLISHING

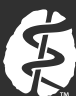

[www.appi.org](http://www.appi.org)  
Email: [appi@psych.org](mailto:appi@psych.org)  
Phone: 1-800-368-5777

AH1639A

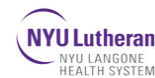

NYU Lutheran Family Health Center (NYU-LFHC), the FQHC outpatient component of the NYU Lutheran Psychiatry Service, is actively recruiting for multiple openings within our Behavioral Health Service Line. NYU-LFHC offers evidence based individualized treatment services for individuals managing mental health disorders, struggling with chemical dependency problems and/or coping with health issues associated with HIV/AIDS. Services are provided by multidisciplinary, multilingual, culturally competent treatment teams composed of physicians, nurses, psychologists, social workers and addiction counselors.

### Recruitment is ongoing for the following openings:

1. Network Behavioral Health Medical Director. Strong background/ interest in community mental health, provides overall psychiatric leadership for all ambulatory behavioral health services. Including supervision and direction of the delivery of clinical services by all licensed and credentialed behavioral health providers, any health professions students and trainees assigned.
2. Child and Adolescent Psychiatrist: Will serve as Associate Medical Director and be responsible for evaluation of patients, diagnosis of illness, overall treatment planning, implementation and follow-up of treatment, and disposition of psychiatric patients. Participates in development of clinical programs and supervision of clinical staff participating in such programs.
3. Adult Psychiatrists (3 positions): Responsible for evaluation of patients, diagnosis of illness, overall treatment planning, implementation and follow-up of treatment, and disposition of psychiatric patients, in the outpatient setting. Specialization in addiction treatment is preferred for one of the open positions.

Learn more about our program and apply for a position by sending your CV to: **W. Gordon Frankle, MD, MBA, Chief, NYU Lutheran Psychiatry Service, and Sean Pavlow, Administrative Director, NYU Lutheran Psychiatry Service at [Sean.Pavlow@nyumc.org](mailto:Sean.Pavlow@nyumc.org)**

## Subscription and Business Information

*The American Journal of Psychiatry*, ISSN 0002-953X, is published monthly by the American Psychiatric Association.

The American Psychiatric Association does not hold itself responsible for statements made in its publications by contributors or advertisers. Unless so stated, material in *The American Journal of Psychiatry* does not reflect the endorsement, official attitude, or position of the American Psychiatric Association or of the Journal's Editorial Board.

Periodicals postage paid at Arlington, VA, and additional mailing offices. POSTMASTER: Send address changes to *The American Journal of Psychiatry*, Circulation Department, American Psychiatric Association, 1000 Wilson Blvd., Suite 1825, Arlington, VA 22209-3901.

### Editorial Office

*American Journal of Psychiatry*  
American Psychiatric Association  
1000 Wilson Blvd., Suite 1825  
Arlington, VA 22209-3901  
Phone: (703) 907-7885, (703) 907-7889  
E-mail: [ajp@psych.org](mailto:ajp@psych.org)

### Customer Service

Phone: (800) 368-5777 (toll-free)  
E-mail: [appi@psych.org](mailto:appi@psych.org)

### APA Member Subscription Services

Phone: (888) 35-PSYCH (toll-free)

### Subscriptions

Per year: individual \$294.00,  
international \$442.00

Institutional subscriptions are tier priced. For institutional site license or pricing information, contact (703) 907-8538 or [institutions@psych.org](mailto:institutions@psych.org).

*Additional subscription options, including single issues and student rates*

Contact Customer Service

### Advertising

*Pharmaceutical Print and Online Advertising*  
Frank Cox, Kathleen Harrison, Tim Wolfinger  
Pharmaceutical Media, Inc.  
30 East 33rd Street  
New York, NY 10016  
Phone: (212) 904-0379  
E-mail: [twolfinger@pminy.com](mailto:twolfinger@pminy.com)

*Nonpharmaceutical and Online Sales*

Eamon Wood  
Pharmaceutical Media, Inc.  
E-mail: [ewood@pminy.com](mailto:ewood@pminy.com)  
(see address and phone above).

### Permissions and Reprints

Material published in the journals of the American Psychiatric Association and American Psychiatric Association Publishing is protected by copyright and all rights are reserved. Material may not be reproduced in any form or by any means without written permission from the copyright owner. For permission to reproduce material published by APA, please visit [http://www.appi.org/Customer\\_Service/Pages/Permissions.aspx](http://www.appi.org/Customer_Service/Pages/Permissions.aspx) for more information. Permission can also be secured through the Copyright Clearance Center ([www.copyright.com](http://www.copyright.com)).

APA does not require that permission be obtained for the photocopying of isolated articles for nonprofit classroom or library reserve use; all fees associated with such permission are waived. This consent does not extend to other kinds of copying, such as copying for general distribution, for advertising or promotional purposes, for creating new collective works, or for resale. Requests for commercial distribution should be directed to (703) 907-7875.

For bulk reprints, please contact Jane Cha, (703) 907-7889; email: [jcha@psych.org](mailto:jcha@psych.org).

Indexed in Abstracts for Social Workers, Academic Abstracts, Biological Abstracts, Chemical Abstracts, Chicago Psychoanalytic Literature Index, Cumulative Index to Nursing Literature, Excerpta Medica, Hospital Literature Index, Index Medicus, International Nursing Index, Nutrition Abstracts, Psychological Abstracts, Science Citation Index, Social Science Source, and Social Sciences Index.

Pages are produced by Dartmouth Journal Services, Waterbury, VT, and printed by Dartmouth Printing Company, Hanover, NH, on acid-free paper effective with Volume 169, Number 1, January 2012.

© 2016 American Psychiatric Association.

# Psychiatrists

## Minnesota

HealthPartners is one of the Upper Midwest's leading multispecialty physician groups. We have practice opportunities for talented, caring BC/BE psychiatrists in metropolitan Minneapolis/St. Paul and central Minnesota:

### Inpatient/Adult

- **Regions Hospital (St. Paul, MN):**  
Our state-of-the-art inpatient psychiatric facilities allow our team of psychiatrists, residents, therapists, social workers, NPs/PAs and nursing staff to provide exceptional care to adult psychiatric inpatients. Our Regions care model schedule is 7 days on/7 days off.

### Outpatient/Adult

- **Central Minnesota (Sartell/St. Cloud)**
- **Metropolitan Minneapolis/St. Paul**

These teams provide integrated outpatient mental health services in our primary care and outpatient specialty clinics located within a variety of urban, suburban and semi-rural communities. Full-time or part-time practices are available. No hospital call responsibilities.

In addition to competitive salaries, HealthPartners offers an excellent benefits package, including an employer-matched 401(k) and 457(b), generous personal time off, malpractice insurance coverage, etc.

Let us tell you more! Please forward your CV and cover letter to: **lori.m.fake@healthpartners.com**, apply online at **healthpartners.com/careers**, or call 800-472-4695 x1. EOE

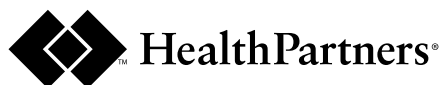

healthpartners.com

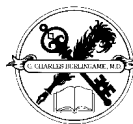

## Call for Nominations

The Institute of Living/Hartford Hospital is pleased to announce that nominations are now being accepted for the 2017 C. Charles Burlingame Award. This award, honoring an outstanding leader in psychiatric education, research or administration, is made in the memory of Dr. Burlingame, psychiatrist-in-chief from 1931 to 1950.

We invite you to nominate a person who has significantly advanced the field of psychiatry. The nomination must include a current curriculum vitae and two letters of support describing the candidate's achievements.

The Institute of Living is a comprehensive behavioral health system for the evaluation and treatment of psychiatric and addiction disorders. We offer a full continuum of services to patients and remain committed to the highest standards of clinical care, research and education.

### Past Recipients

|                                       |                                   |
|---------------------------------------|-----------------------------------|
| 1988 Robert Kellner, M.D., Ph.D.      | 2003 Dilip V. Jeste, M.D.         |
| 1989 William T. Carpenter, Jr., M.D.  | 2004 David H. Barlow, Ph.D.       |
| 1990 Dennis P. Cantwell, M.D.         | 2005 Herbert D. Kleber, M.D.      |
| 1991 George E. Vaillant, M.D.         | 2006 Daniel N. Stern, M.D.        |
| 1992 A. John Rush, M.D.               | 2007 Jerrold F. Rosenbaum, M.D.   |
| 1993 John C. Nemiah, M.D.             | 2008 K. Ranga Rama Krishnan, M.D. |
| 1994 Maurice J. Martin, M.D.          | 2009 David J. Kupfer, M.D.        |
| 1995 Otto F. Kernberg, M.D.           | 2010 Professor Sir Michael Rutter |
| 1996 Charles P. O'Brien, M.D., Ph.D.  | 2011 Jeffrey A. Lieberman, M.D.   |
| 1997 Glen Owen Gabbard, M.D.          | 2012 Judith L. Rapoport, M.D.     |
| 1998 Lissy F. Jarvik, M.D., Ph.D.     | 2013 Nora D. Volkow, M.D.         |
| 1999 Nancy C. Andreasen, M.D., Ph.D.  | 2014 Daniel R. Weinberger, M.D.   |
| 2000 Lewis L. Judd, M.D.              | 2015 David A. Brent, M.D.         |
| 2001 Paul S. Appelbaum, M.D.          | 2016 Steven S. Sharfstein, M.D.   |
| 2002 Charles B. Nemeroff, M.D., Ph.D. |                                   |

Institute  
of Living

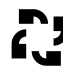

A Division of Hartford Hospital

Nominations should be sent no later than January 11, 2017 to: Harold I. Schwartz, M.D., HHC Regional VP, Behavioral Health Psychiatrist-in-Chief  
The Institute of Living/Hartford Hospital  
200 Retreat Ave., Hartford, CT 06106  
or e-mailed to  
Kathleen.Day@hhchealth.org

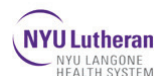

The NYU Lutheran Medical Center's Psychiatric Emergency Services Program, and the NYU Lutheran Inpatient Psychiatry Service, are actively recruiting well-trained, compassionate physicians who excel in patient management and quality improvement to join our team full time. The positions that are based in our psychiatric emergency room are for night and weekend coverage and the position that is based on our inpatient unit is for day time coverage. NYU Lutheran is a mission-driven, patient-centered, integrated community-based, academic medical center in Brooklyn.

In addition to being central to the Psychiatry Service, NYU Lutheran's psychiatrists play integral roles in education, quality improvement, hospital administration, transitions of care, patient safety, research, information technology and population health.

We offer competitive salaries, comprehensive benefits as well as academic support. Psychiatrists at NYU Lutheran are granted faculty appointments to NYU School of Medicine.

We invite you to learn more about our program and to apply for a position by sending your CV to:

**W. Gordon Frankle, MD, Chief, NYU Lutheran Psychiatry Service  
and Sean Pavlow, Administrative Director,  
NYU Lutheran Psychiatry Service at [Sean.Pavlow@nyumc.org](mailto:Sean.Pavlow@nyumc.org)**

# We've got you covered.

For over 30 years, we have provided psychiatrists with exceptional protection and personalized service. We offer comprehensive insurance coverage and superior risk management support through an "A" rated carrier.

## ANNOUNCING NEW ENHANCEMENTS TO THE AMERICAN PSYCHIATRIC ASSOCIATION PSYCHIATRISTS' PROFESSIONAL LIABILITY PROGRAM:

- **Defense Expenses related to Licensing Board Hearings and Other Proceedings:** Increased Limit to \$50,000 per proceeding with NO annual aggregate (higher limits are available up to \$150,000)
- **Fire Legal Liability Coverage:** Limit of liability increased to \$150,000 for fire damage to third party property
- **Emergency Aid Coverage:** Reimbursement up to \$15,000 in costs and expenses for medical supplies
- Insured's **Consent to Settle** is now required in the settlement of any claim – No arbitration clause!
- **First Party Assault and Battery Coverage:** Up to \$25,000 reimbursement for medical expenses related to injuries and/or personal property damage caused by a patient or client
- **Medical Payments Coverage:** Increased limit to \$100,000 for Medical Payments to a patient or client arising from bodily injury on your business premises

## IN ADDITION WE CONTINUE TO OFFER THE FOLLOWING MULTIPLE PREMIUM DISCOUNTS:

- **50% Resident-Fellow Member Discount**
- **Up to 50% New Doctor Discount** (for those who qualify)
- **50% Part Time Discount** for up to 20 client hours a week or less
- **10% New Policyholder Discount** (must be claims free for the last 6 months)
- **15% Child and Adolescent Psychiatrist Discount** for those whose patient base is more than 50% Children and Adolescents
- **10% Claims Free Discount** for those practicing 10 years, after completion of training, and remain claims free
- **5% Risk Management Discount** for 3 hours of CME

*(Above Coverage Features and Discounts are subject to individual state approval)*

Visit us at [apamalpractice.com](http://apamalpractice.com) or call **877.740.1777** to learn more.

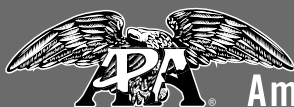

**American Professional Agency**

LEADERS IN PSYCHIATRIC MEDICAL LIABILITY INSURANCE

ENDORSED BY THE  
AMERICAN PSYCHIATRIC  
ASSOCIATION
