OCTOBER 2016 | VOLUME 173 | NUMBER 10

# The American Journal of Psychiatry

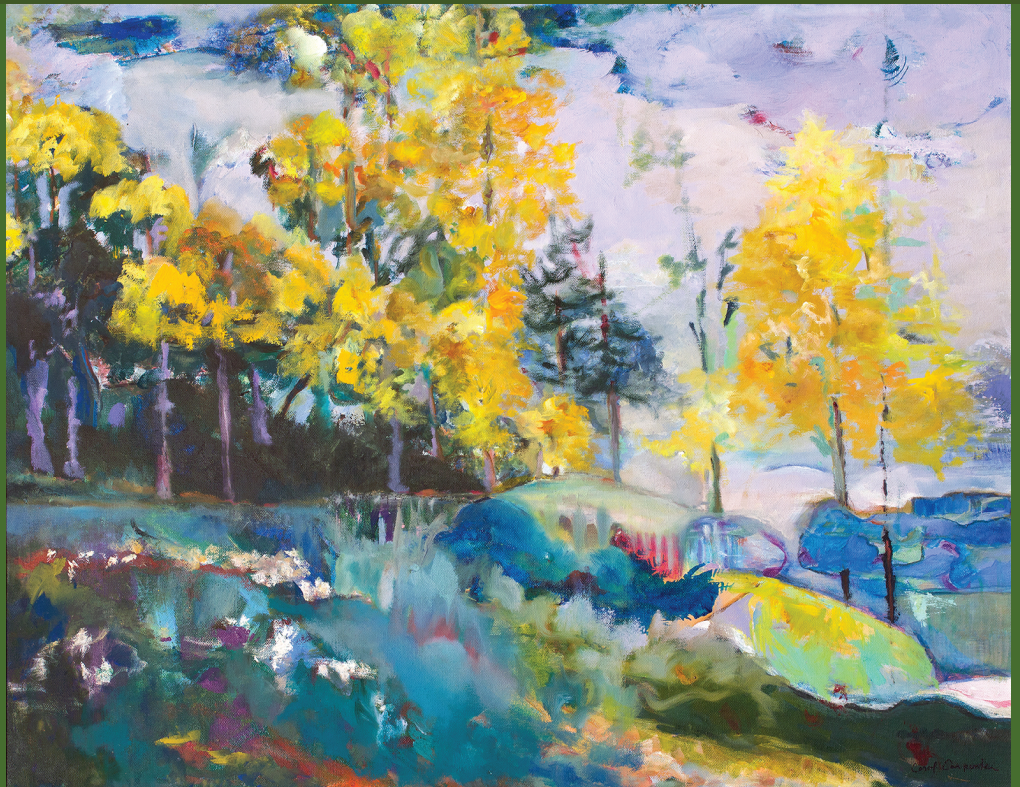

Early Detection of Psychosis Vulnerability: Progress, Opportunity, and Caution

Prevention of Firearm Suicide in the United States:  
What Works and What Is Possible

Long-Term Effects of Evidence-Based Supported Employment  
on Earnings and on SSI and SSDI Participation Among  
Individuals With Psychiatric Disabilities

Offspring of Depressed Parents: 30 Years Later

AMERICAN  
PSYCHIATRIC  
ASSOCIATION

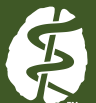

[ajp.psychiatryonline.org](http://ajp.psychiatryonline.org)
