## PERSPECTIVAS

### EDITORIALES

**949 Detección temprana de la vulnerabilidad a la psicosis: Progreso, Oportunidad y Precaución**

*William T. Carpenter, M.D.*

**951 Poniendo la psicosis en su sitio**

*Ian Kelleher, M.D., Ph.D., Mary Cannon, M.D., Ph.D.*

**953 Sosteniendo los efectos a largo plazo del 'empleo con apoyo' para personas con incapacidades psiquiátricas**

*Susan R. McGurk, Ph.D., Kim T. Mueser, Ph.D.*

**956 Hijos de padres deprimidos: Visión a futuro**

*Constance Hammen, Ph.D.*

### INTROSPECCIÓN

**958 Compasión en los ojos del observador**

*Ira Lesser, M.D.*

### TRATAMIENTO EN PSIQUIATRÍA

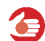

**960 Controversias del tratamiento en TDAH en adultos**

*James J. McGough, M.D., M.S.* **AUDIO** • **GUÍAS CLÍNICAS**

### IMÁGENES EN PSIQUIATRÍA

**967 Edward Cowles (1837–1919)**

*Richard Noll, Ph.D., Kenneth S. Kendler, M.D.*

### RESÚMENES Y RESEÑAS

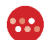

**969 Prevención de suicidio con armas de fuego en los Estados Unidos: Qué funciona y qué es posible**

*J. John Mann, M.D., Christina A. Michel, B.A.* **EMC** • **AUDIO**

## NUEVAS INVESTIGACIONES

### ARTÍCULOS

**980 Un calculador del riesgo individualizado para la investigación en psicosis prodrómica**

*Tyrone D. Cannon, Ph.D., et al.* **EDITORIAL** • **AUDIO** • **VIDEO**

**989 Predicción personalizada de psicosis: Validación externa del calculador de riesgo de psicosis de NAPLS-2 con el Proyecto EDIPPP**

*Ricardo E. Carrión, Ph.D., et al.* **EDITORIAL**

**997 Las asociaciones bidireccionales entre las experiencias psicóticas y los trastornos mentales del DSM-IV**

*John J. McGrath, M.D., Ph.D., et al.* **EDITORIAL** • **AUDIO** • **GUÍAS CLÍNICAS**

**1007 Efectos a largo plazo del 'empleo con apoyo' basado en la evidencia sobre las ganancias y sobre la participación en la SSI (Seguridad de Ingreso Suplementario) y la SSDI (Seguro de Discapacidad del Seguro Social) en los individuos con discapacidades psiquiátricas**

*Judith A. Cook, Ph.D., et al.* **EDITORIAL** • **EMC** • **AUDIO** • **GUÍAS CLÍNICAS**

**1015 Depresión mixta en trastorno bipolar: Tasa de prevalencia y correlatos clínicos durante el seguimiento naturalístico en la red bipolar Stanley**

*Shafali Miller, M.D., et al.* **GUÍAS CLÍNICAS**

**1024 Hijos de pacientes deprimidos: 30 años después**

*Myrna M. Weissman, Ph.D., et al.* **EDITORIAL** • **EMC** • **AUDIO** • **GUÍAS CLÍNICAS**

**1033 Hiperreacción de la red neural del miedo durante el condicionamiento y la extinción del miedo en hombres consumidores de cocaína**

Anne Marije Kaag, M.Sc., et al. VIDEO

**COMUNICADOS Y ACTUALIZACIONES**

**CARTAS AL EDITOR**

**1043 Efectos de la buprenorfina en dosis ultra bajas en la ideación suicida: ¿afectados por la variable de confusión de alivio del dolor físico?**

Xiulu Ruan, M.D., et al.

**1043 Buprenorfina en dosis ultra bajas para el dolor mental: Respuesta a Ruan et al.**

Yoram Yovell, M.D., Ph.D., Gali Bar, Ph.D.

**1044 Efectos secundarios perjudiciales en el cerebro de infusiones repetidas de ketamina**

Kenji Hashimoto, Ph.D.

**1045 Comparación de la eficacia antidepressiva y la dosificación de los enantiómeros de ketamina: Respuesta a Hashimoto**

Jaskaran B. Singh, M.D., [on behalf of the authors]

**1046 Subregulación de la expresión del gen SIRT1 en el trastorno depresivo mayor**

Xiong-Jian Luo, Ph.D., Chen Zhang, M.D., Ph.D.

**RESEÑAS BIBLIOGRÁFICAS**

**1047 Marijuana and Mental Health [Marihuana y salud mental]**

Kimberly Nordstrom, M.D., J.D.

**1048 People With Mental Illness in the Criminal Justice System: Answering a Cry for Help [Personas con enfermedad mental en el sistema jurídico penal: Respuesta a un llamado de auxilio]**

Darren L. Lish, M.D., D.F.A.P.A.

**ACTOS OFICIALES**

**1050 Informes del Concejo de la APA**

**OTROS TEMAS DE INTERÉS**

**1049 Correction**

**1065 Educación Médica Continuada**

**Cubierta:** ["Yellow Forest" (22"x28" Oil) by Carol Carpenter. The painting was part of the July 2016 "Dynamic Visions" exhibition at the Agora Gallery in New York City. Additional images of Ms. Carpenter's work can be viewed on her website: [www.carpenterfineart.com](http://www.carpenterfineart.com)]

Article content that addresses **Core Competencies**, defined by the Accreditation Council of Graduate Medical Education and the American Board of Medical Specialties, is indicated by the following symbols:

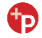

Professionalism

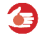

Patient Care and Procedural Skills

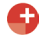

Medical Knowledge

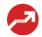

Practice-Based Learning and Improvement

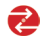

Interpersonal and Communication Skills

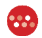

Systems-Based Practice.

More information is available at [www.abms.org/maintenance\\_of\\_certification/MOC\\_competencies.aspx](http://www.abms.org/maintenance_of_certification/MOC_competencies.aspx)

**La Tabla de Contenidos y resúmenes de Este Número Está Disponible en Español**

(This issue's Table of Contents and abstracts are available in Spanish)

Translation presented in collaboration with the Office of Global Health, Rutgers-Robert Wood Johnson Medical School

Support for this effort provided by ACTA Colombia.

**Translation courtesy of**

**Sergi Casals, M.A.**, Garuna, Medellín, Colombia ([www.garunaeditors.com](http://www.garunaeditors.com))

**Carlos Lopez Jaramillo, M.D.**, Universidad de Antioquia, Medellín, Colombia

**Javier I. Escobar, M.D., M.Sc.**, Rutgers-Robert Wood Johnson Medical School

**AUDIO** Highlighted in AJP Audio, a downloadable .mp3 file available at [ajp.psychiatryonline.org](http://ajp.psychiatryonline.org)

**EMC** A course covering the content of this article is available online for paid subscribers to the AJP CME Course program

**EDITORIAL** Discussed in one of the issue's editorials

**GUÍAS CLÍNICAS** Clinical Guidance provided on the English table of contents

**VIDEO** Highlighted online by Deputy Editor Daniel S. Pine, M.D.

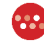

## Prevención de suicidio con armas de fuego en los Estados Unidos: Qué funciona y qué es posible

J. John Mann, M.D., Christina A. Michel, B.A.

**Objetivo:** Alrededor de 21.000 suicidios en los Estados Unidos en 2014 involucraron una arma de fuego. Los autores revisaron evidencia de todo el mundo con referencia a la relación entre las tasas de propiedad de armas de fuego y las tasas de suicidio con armas de fuego y la efectividad potencial de las estrategias basadas en las políticas para prevenir los suicidios con arma de fuego en los Estados Unidos.

**Método:** Se identificaron publicaciones relevantes en PubMed, PsycINFO, MEDLINE y Google Académico desde 1980 hasta septiembre de 2015, utilizando los términos de búsqueda «suicidio» Y «arma de fuego» O «armas». Excluyendo los duplicados, se encontraron 1.687 resultados, 60 de los cuales se seleccionaron para inclusión; a partir de dichas fuentes se identificaron otros 10 estudios, para un total de 70 estudios.

**Resultados:** Los estudios de casos y controles y ecológicos que investigaron variaciones geográficas y temporales en la propiedad de armas de fuego y suicidios con armas de fuego indican que un mayor acceso a las armas de fuego está asociado con tasas más altas de suicidio con arma de fuego. Análisis de series temporales, principalmente de otros países, muestran que la legislación que limita la propiedad de armas de fuego reduce las tasas de suicidio con arma de fuego.

Dado que la Segunda Enmienda de la constitución de los Estados Unidos restringe la legislación limitando en gran medida el acceso a las armas de fuego en los Estados Unidos, se pasó a hacer más énfasis en la restricción del acceso a dichas armas para aquellos en riesgo de autolesionarse o lesionar a los demás. La mayoría de los suicidios son con armas que se compraron años antes. Las iniciativas específicas que se han emprendido, como órdenes de protección de violencia con armas, tecnología de armas inteligentes y campañas pedagógicas para la seguridad en el uso de armas, reducen potencialmente el acceso de los individuos suicidas a las armas adquiridas previamente. Dichas medidas son demasiado nuevas para tener evidencia de su efectividad.

**Conclusiones:** Restringir en gran medida la disponibilidad de las armas de fuego y el acceso a las mismas ha reducido las tasas de suicidio con arma de fuego en otros países pero no parece factible en los Estados Unidos. Los enfoques que restringen el acceso de individuos en riesgo a armas de fuego ya adquiridas, que implican al público y a los principales agentes, requieren la urgente implementación y evaluación de los resultados para la prevención del suicidio con arma de fuego.

(*Am J Psychiatry* 2016; 173:969–979)

## Un calculador del riesgo individualizado para la investigación en psicosis prodrómica

Tyrone D. Cannon, Ph.D., Changhong Yu, M.S., Jean Addington, Ph.D., Carrie E. Bearden, Ph.D., Kristin S. Cadenhead, M.D., Barbara A. Cornblatt, Ph.D., Robert Heinssen, Ph.D., Clark D. Jeffries, Ph.D., Daniel H. Mathalon, Ph.D., M.D., Thomas H. McGlashan, M.D., Diana O. Perkins, M.D., M.P.H., Larry J. Seidman, Ph.D., Ming T. Tsuang, M.D., Ph.D., Elaine F. Walker, Ph.D., Scott W. Woods, M.D., Michael W. Kattan, Ph.D.

**Objetivo:** Aproximadamente el 20%–35% de los individuos entre 12 y 35 años que cumplen con los criterios de un síndrome de riesgo prodrómico viran hacia la psicosis en los 2 años siguientes. Sin embargo, esta cifra ignora el hecho que los casos clínicos de alto riesgo varían considerablemente en riesgo. El objetivo de los autores fue crear un calculador de riesgo, basado en los perfiles de los indicadores de riesgo, capaz de determinar la probabilidad de conversión a psicosis en pacientes individuales.

**Método:** Los sujetos de estudio fueron 596 participantes con alto riesgo clínico de la segunda fase del *North American Prodrome Longitudinal Study* (Estudio longitudinal estadounidense del Pródromo) a quienes se les hizo seguimiento hasta el momento de la conversión a psicosis o el último contacto (hasta 2 años). Los predictores que se examinaron se limitaron a aquellos que están respaldados por estudios previos y se pueden obtener con facilidad en escenarios clínicos generales. Se utilizó la regresión de tiempo a evento para construir un modelo multivariado para predecir la conversión, con validación interna utilizando 1.000 remuestros bootstrap.

**Resultados:** La probabilidad de conversión a psicosis en 2 años fue del 16%. Se encontró que niveles más altos de contenido inusual del pensamiento y sentimiento de sospecha, mayor disminución en el funcionamiento social, menor aprendizaje verbal y desempeño de la memoria, velocidad

más lenta de procesamiento y menor edad en el momento de inicio, todos son factores que contribuyen al riesgo individual de psicosis. Los eventos de vida estresantes, el trauma y el historial familiar de esquizofrenia no fueron predictores significativos. El modelo multivariado obtuvo un índice de concordancia de 0,71 y, como se reporta en un artículo de Carrión et al., publicado de manera concurrente con este, se validó en una serie de datos externos independientes. Los resultados se ejemplifican en una herramienta de predicción de riesgo basada en la web diseñada para ser de máxima utilidad en protocolos de investigación relacionados con el pródromo en psicosis.

**Conclusiones:** Existe un calculador de riesgo comparable en precisión a los de la enfermedad cardiovascular y el cáncer, para predecir riesgos de conversión individualizados en casos clínicos de alto riesgo acabados de identificar. Dado que el calculador de riesgo se puede aplicar de forma válida solamente para los pacientes que dan positivo en la herramienta *Structured Clinical Interview for Psychosis Risk Syndromes* (Entrevista clínica estructurada para síndromes de riesgo de psicosis), cuya administración requiere entrenamiento, sus usos más inmediatos serán en la investigación sobre los factores de riesgo de psicosis y en ensayos clínicos para la investigación (de prevención).

(*Am J Psychiatry* 2016; 173:980–988)

# Predicción personalizada de psicosis: Validación externa del calculador de riesgo de psicosis de NAPLS-2 con el Proyecto EDIPPP

Ricardo E. Carrión, Ph.D., Barbara A. Cornblatt, Ph.D., M.B.A., Cynthia Z. Burton, Ph.D., Ivy F. Tso, Ph.D., Andrea M. Auther, Ph.D., Steven Adelsheim, M.D., Roderick Calkins, Cameron S. Carter, M.D., Ph.D., Tara Niendam, Ph.D., Tamara G. Sale, M.A., Stephan F. Taylor, M.D., William R. McFarlane, M.D.

**Objetivo:** Como parte de la segunda parte del Estudio Longitudinal Estadounidense del Pródromo (NAPLS-2, por sus siglas en inglés), Cannon et al. reportan sus resultados, de forma concurrente con el presente artículo, sobre el calculador de riesgo para la predicción individualizada de un trastorno psicótico en un período de 2 años. El estudio actual representa una validación externa del calculador de riesgo de psicosis de NAPLS-2 utilizando una muestra independiente de pacientes con alto riesgo clínico de psicosis, reunida como parte del Programa de Detección temprana, Intervención y Prevención de Psicosis (EDIPPP, por sus siglas en inglés).

**Método:** Del total de la muestra de EDIPPP de 210 sujetos con riesgo clínico alto con base en la Entrevista Estructurada para Síndromes Prodrómicos, a 176 se les hizo como mínimo una evaluación de seguimiento y se les incluyó en la construcción de un nuevo modelo de predicción con seis variables de predicción en el calculador de riesgo de psicosis de NAPLS-2 (pensamientos inusuales y sospecha, desempeño en la prueba de codificación de símbolos, desempeño en la prueba de aprendizaje verbal, disminución en funciona-

miento social, edad en el momento de inicio e historial familiar). El desempeño de discriminación se evaluó con el área bajo la curva característica operativa del receptor (AUC) El calculador de riesgo de NAPLS-2 se utilizó entonces para generar un estimado de riesgo de psicosis para cada caso en la muestra externa de validación.

**Resultados:** El modelo de validación externa mostró buena discriminación, con una AUC de 0,790 (IC 95%=0,644–0,937). Además, el riesgo personalizado generado por el calculador de riesgo ofreció un estimado sólido del resultado real de la conversión en la muestra de validación.

**Conclusiones:** Dos muestras independientes de pacientes con alto riesgo clínico convergen para validar el calculador de riesgo de psicosis de NAPLS-2. Este calculador de predicción representa un paso significativo hacia la intervención temprana y el tratamiento personalizado de los trastornos psicóticos.

(*Am J Psychiatry* 2016; 173:989–996)

## Las asociaciones bidireccionales entre las experiencias psicóticas y los trastornos mentales del DSM-IV

John J. McGrath, M.D., Ph.D., Sukanta Saha, Ph.D., Ali Al-Hamzawi, M.D., Laura Andrade, M.D., Ph.D., Corina Benjet, Ph.D., Evelyn J. Bromet, Ph.D., Mark Oakley Browne, M.D., Ph.D., Jose M. Caldas de Almeida, M.D., Ph.D., Wai Tat Chiu, A.M., Koen Demyttenaere, M.D., Ph.D., John Fayyad, M.D., Silvia Florescu, M.D., Ph.D., Giovanni de Girolamo, M.D., Oye Gureje, M.D., Ph.D., Josep Maria Haro, Ph.D., Margreet ten Have, Ph.D., Chiyi Hu, M.D., Ph.D., Viviane Kovess-Masfety, M.D., Ph.D., Carmen C.W. Lim, M.Sc., Fernando Navarro-Mateu, M.D., Ph.D., Nancy Sampson, B.A., José Posada-Villa, M.D., Kenneth S. Kendler, M.D., Ronald C. Kessler, Ph.D.

**Objetivo:** Si bien actualmente se reconoce que las experiencias psicóticas están asociadas con un riesgo elevado de posteriores trastornos mentales, no se comprenden con detalle las relaciones recíprocas retrasadas entre los inicios tempranos de las experiencias psicóticas y los trastornos mentales. Utilizando datos de las Encuestas Mundiales de la Salud Mental (WMH, por sus siglas en inglés) de la Organización Mundial de la Salud, los autores evaluaron las asociaciones temporales bidireccionales entre las experiencias psicóticas y los trastornos mentales.

**Método:** Las encuestas de la WMH evaluaron la prevalencia de por vida y la edad al inicio de las experiencias psicóticas y 21 trastornos mentales comunes del DSM-IV en 31.261 participantes adultos de 18 países. Se emplearon modelos de supervivencia de tiempo discreto para examinar las asociaciones bivariadas y multivariadas entre las experiencias psicóticas y los trastornos mentales.

**Resultados:** Las experiencias psicóticas primarias temporales estuvieron asociadas de forma significativa con el subsiguiente primer comienzo de ocho de los 21 trastornos mentales (trastorno depresivo mayor, trastorno bipolar, trastorno

de ansiedad generalizada, fobia social, trastorno por estrés postraumático, trastorno de ansiedad por separación en adultos, bulimia nerviosa y abuso de alcohol), con un índice de probabilidad (*odds ratio*) entre 1,3 (IC 95%=1,2–1,5) para trastorno depresivo mayor y 2,0 (IC 95%=1,5–2,6) para trastorno bipolar. En contraste, 18 de los 21 trastornos mentales primarios estuvieron asociados de forma significativa con el subsiguiente primer comienzo de experiencias psicóticas, con un índice de probabilidad entre 1,5 (IC 95%=1,0–2,1) para trastorno de ansiedad por separación infantil y 2,8 (IC 95%=1,0–7,8) para anorexia nerviosa.

**Conclusiones:** Mientras las experiencias psicóticas primarias temporales están asociadas con un riesgo elevado de varios trastornos mentales subsiguientes, estos datos muestran que la mayoría de los trastornos mentales están asociados con un riesgo elevado de subsiguientes experiencias psicóticas. Futuras investigaciones de los factores subyacentes que explican estas relaciones de orden temporal pueden arrojar luz sobre la etiología de las experiencias psicóticas.

(*Am J Psychiatry* 2016; 173:997–1006)

## Efectos a largo plazo del 'empleo con apoyo' basado en la evidencia sobre las ganancias y sobre la participación en la SSI (Seguridad de Ingreso Suplementario) y la SSDI (Seguro de Discapacidad del Seguro Social) en los individuos con discapacidades psiquiátricas

Judith A. Cook, Ph.D., Jane K. Burke-Miller, Ph.D., Emily Roessel, M.P.P.

**Objetivo:** Este estudio examina los efectos a largo plazo de los servicios de 'empleo con apoyo' basado en la evidencia en tres resultados vocacionales: participación en la fuerza laboral, ingresos y consecución del estado de no beneficiario de la seguridad social (SSA, por sus siglas en inglés: *Social Security Administration*) por medio de la suspensión o la terminación de los pagos en efectivo por incapacidad por motivo de trabajo (NSTW, por sus siglas en inglés).

**Método:** Los datos de 449 individuos con incapacidades psiquiátricas que participaron en un ensayo controlado multicéntrico de 'empleo con apoyo' se aparearon con datos de la seguridad social (SSA) para un período de 13 años (2000–2012) posterior a los servicios de empleo con apoyo. Los resultados a largo plazo se analizaron utilizando modelos de regresión de efectos aleatorios que comparaban los participantes en las condiciones experimental y de control en medidas de empleo, ingresos y consecución de estado NSTW. Los autores hicieron ajustes para tiempo, edad, raza/etnicidad, género, educación, diagnóstico de esquizofrenia, historial de abusos de sustancias y región geográfica.

**Resultados:** Los resultados generales fueron modestos en los 13 años de seguimiento: 32,9% de los participantes tuvieron

algun tipo de ingresos y 13,1% consiguiendo el estatus NSTW. Los receptores de 'empleo con apoyo' tenían casi tres veces más posibilidades que los sujetos control de ser empleados a lo largo de los 13 años (*odds ratio*=2,89). Aunque los ingresos fueron bajos, los participantes de 'empleo con apoyo' tuvieron ingresos mensuales significativamente más altos que los sujetos control a lo largo del tiempo (estimado del parámetro=\$23,82) y tuvieron más probabilidades que los sujetos control de obtener el estatus NSTW (*odds ratio*=12.99). El efecto de 'empleo con apoyo' disminuyó y se atenuó completamente con el tiempo.

**Conclusiones:** Los hallazgos del estudio indican una ventaja vocacional leve pero significativa para los receptores de 'empleo con apoyo' basado en la evidencia en la década posterior a la entrega del servicio, lo que aumenta la evidencia de la durabilidad de los efectos del 'empleo con apoyo'. Los resultados pueden informar políticas diseñadas para ayudar a los trabajadores a fortalecer la seguridad económica y disminuir la dependencia de los beneficios por incapacidad de la seguridad social.

(*Am J Psychiatry* 2016; 173:1007–1014)

# Depresión mixta en trastorno bipolar: Tasa de prevalencia y correlatos clínicos durante el seguimiento naturalístico en la red bipolar Stanley

Shefali Miller, M.D., Trisha Suppes, M.D., Ph.D., Jim Mintz, Ph.D., Gerhard Helleman, Ph.D., Mark A. Frye, M.D., Susan L. McElroy, M.D., Willem A. Nolen, M.D., Ph.D., Ralph Kupka, M.D., Ph.D., Gabriele S. Leverich, L.C.S.W., Heinz Grunze, M.D., Lori L. Altshuler, M.D., Paul E. Keck, Jr., M.D., Robert M. Post, M.D.

**Objetivo:** El DSM-5 introdujo el especificador «con características mixtas» para los episodios depresivos mayores. Los autores evaluaron la prevalencia y la fenomenología de la depresión mixta en pacientes con trastorno bipolar y compararon cualitativamente una gama de umbrales de diagnóstico para depresión mixta.

**Método:** En un estudio naturalístico, a 907 pacientes adultos de consulta externa con trastorno bipolar que participaban en la Red Bipolar de la Fundación Stanley, se les hizo seguimiento en 14.2140 visitas desde 1995 hasta 2002. En cada visita se administraron el Inventario de Sintomatología Depresiva–Versión Evaluada por un Clínico (IDS-C) y la Escala de Evaluación de Manía de Young (YMRS).

**Resultados:** La depresión mixta, definida por una puntuación  $\geq 15$  en el inventario IDS-C y una puntuación  $>2$  y  $<12$  en la misma visita en la escala YMRS, se observó en 2.139 visitas (14,9% del total de las visitas y 43,5% de las visitas con depresión) por 584 pacientes (64,4% de todos los pacientes). La probabilidad de experimentar hipomanía subumbral durante las visitas con depresión fue significativamente más alta para las mujeres que para los hombres (40,7% comparado con

34,4%). Los pacientes con una o más visitas con depresión mixta tuvieron más visitas sintomáticas y menos visitas eutímicas en comparación con aquellos que no tuvieron visitas con depresión mixta. Las definiciones de depresión mixta basadas en el DSM-5 (desde las definiciones más estrictas que requieren  $\geq 3$  ítems que no se solapen de la escala YMRS de manera concurrente con una puntuación  $\geq 15$  en el inventario IDS-C, hasta definiciones más amplias que requieren  $\geq 2$  ítems que no se solapen de la escala YMRS) dieron como resultado tasas de prevalencia de depresión inferiores (6,3% y 10,8% de las visitas, respectivamente) pero se encontró que tenían una relación familiar con el género y la severidad de los síntomas longitudinales.

**Conclusiones:** En los pacientes externos con trastorno bipolar, y particularmente en las mujeres, fueron comunes los síntomas hipomaniacos concurrentes observados durante las visitas con depresión. Los criterios diagnósticos del DSM-5 para depresión con características mixtas pueden tener sensibilidad inadecuada para detectar pacientes con depresión mixta.

(*Am J Psychiatry* 2016; 173:1015–1023)



## Hijos de pacientes deprimidos: 30 años después

Myrna M. Weissman, Ph.D., Priya Wickramaratne, Ph.D., Marc J. Gameroff, Ph.D., Virginia Warner, Dr.P.H., Daniel Pilowsky, M.D., M.P.H., Rajni Gathibandhe Kohad, M.D., M.P.H., Helena Verdeli, Ph.D., Jamie Skipper, M.A., Ardesheer Talati, Ph.D.

**Objetivo:** Aunque el riesgo elevado de psicopatología en los hijos biológicos de padres deprimidos se ha replicado en numerosas ocasiones, es menos lo que se conoce del resultado a largo plazo hasta que alcanzan la edad en que tienen mayor riesgo. Los autores presentan un seguimiento de 30 años de los hijos biológicos (edad media=47 años) de padres deprimidos (riesgo alto) y de padres no deprimidos.

**Método:** Se hizo seguimiento hasta 30 años a 147 hijos de padres de la misma comunidad que estaban entre moderadamente y severamente deprimidos y de padres que no estaban deprimidos. Las evaluaciones diagnósticas se llevaron a cabo a ciegas del estado clínico de los padres. Un médico o un doctor en psicología realizaron los diagnósticos finales a ciegas.

**Resultados:** El riesgo de depresión mayor fue aproximadamente tres veces más alto en los hijos de padres con alto riesgo. El período de mayor riesgo del inicio por primera vez fue entre los 15 y los 25 años en ambos grupos. Los inicios en la pre-pubertad fueron poco comunes, pero los hijos con alto riesgo tuvieron un riesgo 10 veces mayor. El inicio temprano de la depresión mayor visto en los hijos de padres deprimidos no fue compensado por el posterior inicio de la enfermedad por primera vez en el grupo de bajo riesgo cuando estos crecieron. Las tasas aumentadas de depresión

mayor en el grupo de alto riesgo fueron explicadas en su mayor parte por los inicios tempranos, pero las recurrencias posteriores en el grupo de alto riesgo aumentaron significativamente. Los hijos de padres con alto riesgo siguen teniendo un peor funcionamiento general y reciben más tratamiento para problemas emocionales. Hubo una mortalidad elevada en el grupo de alto riesgo (5,5% en comparación con 2,5%) debido a causas no naturales, con una diferencia de casi 8 años en la edad media cuando fallecieron (38,8 años en comparación con 46,5 años).

**Conclusiones:** Los hijos de padres deprimidos siguen teniendo alto riesgo de depresión, morbilidad y mortalidad que persiste hasta la mediana edad. Si bien la adolescencia es el principal período de inicio de depresión mayor en ambos grupos en riesgo, son los hijos con historial familiar los que luego tienen recurrencias y un resultado pobre cuando maduran. En la era de la medicina personalizada, hasta que se encuentre un entendimiento con una mayor base biológica del riesgo individual, una simple evaluación del historial familiar de depresión mayor como parte de la atención clínica puede ser un predictor de individuos en riesgo a largo plazo.

(*Am J Psychiatry* 2016; 173:1024–1032)

## Hiperreacción de la red neural del miedo durante el condicionamiento y la extinción del miedo en hombres consumidores de cocaína

Anne Marije Kaag, M.Sc., Nina Levar, M.Sc., Karlijn Woutersen, M.Sc., Judith Homberg, Ph.D., Wim van den Brink, Ph.D., M.D., Liesbeth Reneman, Ph.D., M.D., Guido van Wingen, Ph.D.

**Objetivo:** Los autores investigaron si el trastorno por consumo de cocaína está asociado con anomalías en las bases neuronales del condicionamiento aversivo y el aprendizaje de la extinción, ya que dichos procesos pueden jugar un papel importante en el desarrollo y la persistencia del abuso de drogas.

**Método:** Cuarenta hombres consumidores regulares de cocaína y 51 hombres como sujetos control fueron sometidos a un protocolo de condicionamiento y extinción del miedo durante IRM funcional. Se midió la respuesta de conductancia cutánea durante el experimento como un índice de respuestas condicionadas.

**Resultados:** Los consumidores de cocaína mostraron hiperreacción de la amígdala y la ínsula durante el condicionamiento al miedo, así como hiperreacción de la corteza prefrontal dorsomedial durante el aprendizaje de la extinción. En los consumidores de cocaína, pero no en los sujetos control,

las respuestas de conductancia de la piel estuvieron correlacionadas positivamente con la reacción de la ínsula, la amígdala y la corteza prefrontal dorsomedial durante el condicionamiento al miedo, pero correlacionadas negativamente con la reacción de la corteza prefrontal ventromedial durante el aprendizaje de la extinción.

**Conclusiones:** La sensibilidad aumentada hacia las señales aversivas condicionadas en los consumidores de cocaína pueden ser un factor de riesgo de la compulsión por aliviar el estrés en el trastorno por consumo de cocaína. Estos resultados apoyan el papel postulado del condicionamiento aversivo alterado en el trastorno por consumo de cocaína y pueden ser un paso importante para comprender el papel del aprendizaje aversivo en la patología del trastorno por consumo de cocaína.

*(Am J Psychiatry 2016; 173:1033–1042)*
